# Supplementary material
Source: Springer Nature journal article supplement (https://www.springermedizin.de/resource/supplementary/12985_2013_2365_MOESM1_ESM.pdf/9606916)

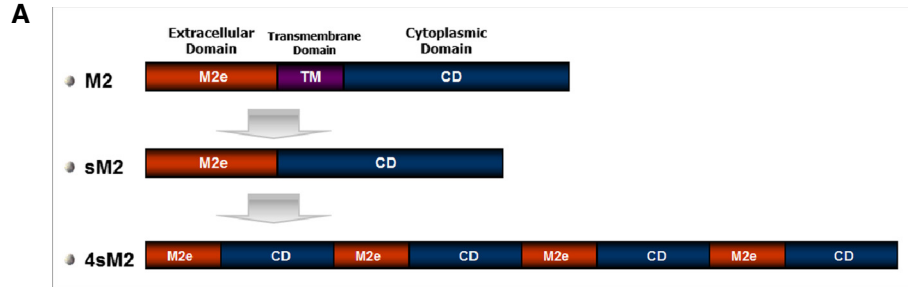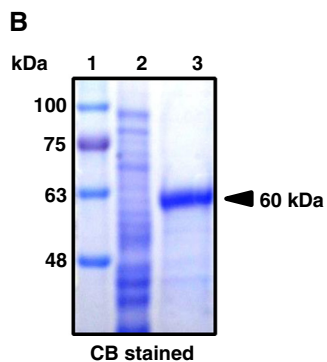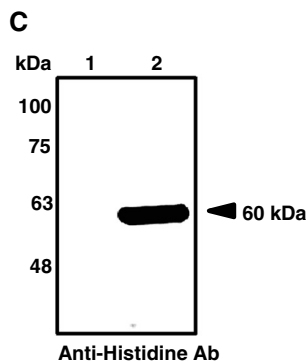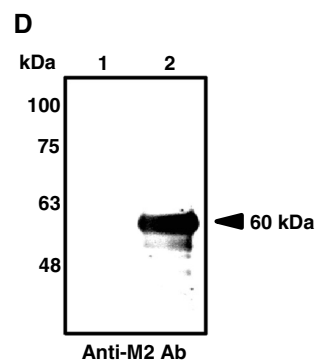

**E**

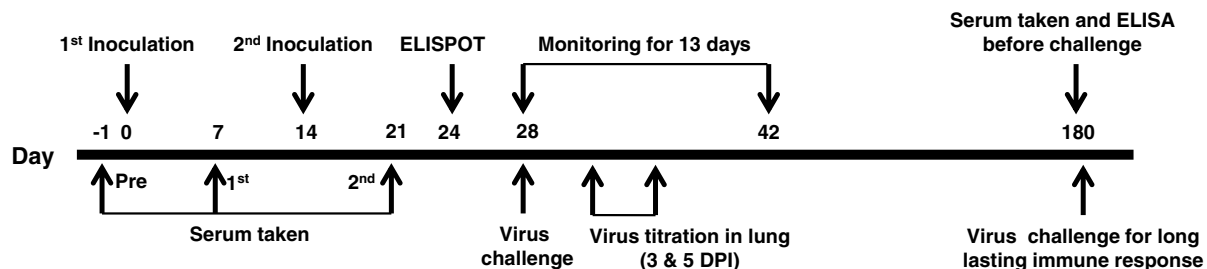

Supplement: MOESM1 [file 9606916]
